# Supplementary material
Source: Springer Nature journal article supplement (https://www.springermedizin.de/resource/supplementary/12913_2012_2251_MOESM11_ESM.pdf/9530064)

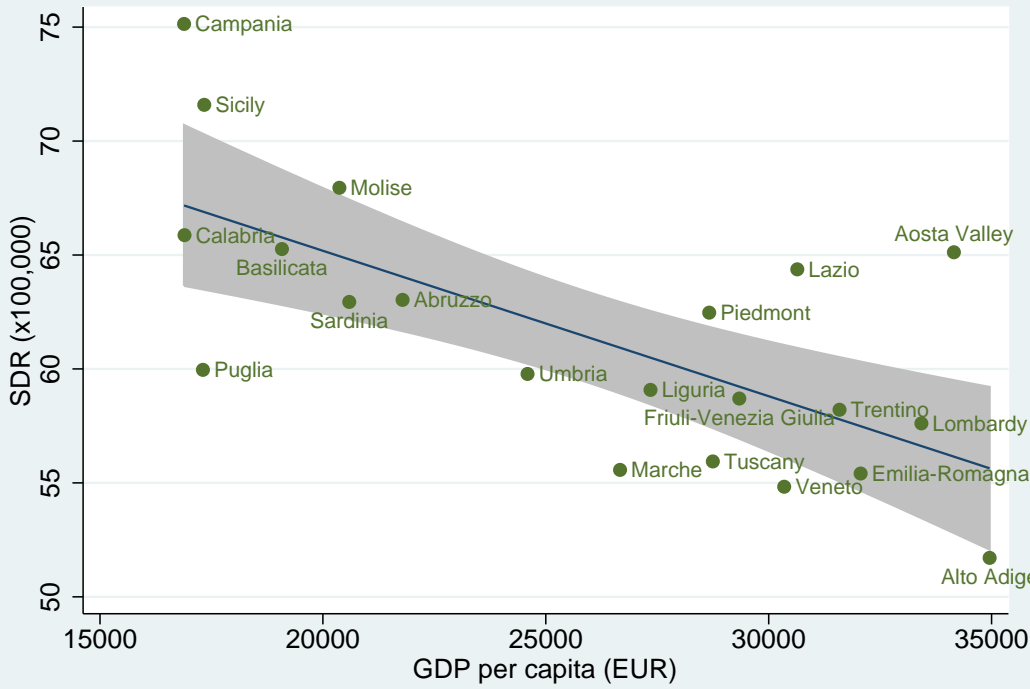

$r(p\text{-value}) = -0.6859(0.0006)$

Supplement: MOESM11 [file 9530064]
